# Supplementary material for: Detection of Epstein-Barr Virus Infection in Non-Small Cell Lung Cancer
Source: MDPI journal article supplement (doi:10.3390/cancers11060759), 2019-05-31
Supplement: s1 [file s1]

1 **FIGURE LEGENDS – SUPPLEMENTARY MATERIAL**

2

3 **Table S1. EBV read counts in EBV(+) non-small cell lung cancer (NSCLC).**

4

5 **Table S2. Type I EBV was detected in EBV(+) NSCLC.** Data sets of EBV(+)

6 JY and EBV(+) P3HR1 cells which carry either Type I or Type II EBV strain were

7 analyzed and used as positive controls.

8

9 **Figure S1. Unsupervised hierarchical cluster analysis of EBV(+) NSCLC and**

10 **EBV(+) nasopharyngeal carcinoma (NPC) data sets.** Cellular gene

11 expression data of EBV(+) NSCLC and EBV(+) NPC samples were subjected to

12 the unsupervised hierarchical cluster analysis using the pheatmap R package

13 with the default settings. The dendrogram was then visualized using the

14 pheatmap R package with the default settings.

15

16 **Figure S2. The EBV transcriptome in lung cancer.** EBV genome coverage

17 data for the four EBV(+) NSCLC. Data was displayed using the Integrative

18 Genomics Viewer (IGV) using the modified Akata-EBV genome. The modified

19 EBV Akata genome was split between the BBLF2/3 and the BGLF3.5 lytic genes

20 rather than at the terminal repeats to accommodate coverage of splice junctions

21 for the latency membrane protein LMP2. The y axis represents the number of

22 reads at each nucleotide position. Blue features represent lytic genes, red

23 features represent latent genes, green features represent potential noncoding

genes, aquamarine features represent microRNAs, and black features represent non-gene features (e.g., repeat regions).

**Figure S3. Alternative splicing in the EBV LMP2A in EBV-high NSCLC.**

RNA-seq data of the EBV-high NSCLC were analyzed using the STAR aligner and were aligned to the modified Akata-EBV genome to obtain splice junction information. Junctions were visualized using the Integrative Genomic Viewer (IGV). The thickness of the red junction features correlates with the number of reads for the respective junction. The number of junction spanning reads for each junction is indicated above each junction feature. Inset: Detailed read coverage data for the 5' flanking region of the second exon of EBV LMP2A.

**Figure S4. Representative images of hematoxylin and eosin staining of EBV(+) NSCLC and adjacent normal lung samples.** Arrowheads point to the infiltrating immune cells. Scale bar: 50  $\mu$ m.

**Figure S5. EBV induces cellular checkpoint molecules in lung squamous cell carcinoma cells.** (A) NCI-H1703 cells were transfected with DNA plasmids carrying either recombinant EBV M81 strain (rM81) or B95.8 strain (rB95.8) or the control pUHD10 (CNTL) plasmids. Forty-eight hours post-transfection, cells were examined by fluorescence microscopy. Both the recombinant EBV strains rM81 and rB95.8 carry the GFP gene (Green Fluorescence Protein) which can be constitutively expressed. Nuclei were visualized by NucBlue (Hoeschst)

staining. (B and C) Total RNA was extracted from the transfected NCI-H1703 cells and subjected to the qRT-PCR analysis. GAPDH was analyzed as a reference. The expression of cellular checkpoint molecules and EBV genes was determined by the comparative  $C_T$  method ( $2^{-\Delta\Delta C_T}$ ).

**Table S3. List of 184 analyzed human lung cancer cell lines from the Cancer Cell Line Encyclopedia (CCLE) cohort.**

| Patient ID   | Total number of EBV read | Total number of human read | EBV reads per million mapped human reads |
|--------------|--------------------------|----------------------------|------------------------------------------|
| TCGA-96-A4JL | 24874                    | 59652672                   | 416.98                                   |
| TCGA-69-8255 | 94                       | 117763296                  | 0.80                                     |
| TCGA-98-7454 | 57                       | 79659303                   | 0.72                                     |
| TCGA-66-2769 | 30                       | 71251428                   | 0.42                                     |

**Table S1. EBV read counts in EBV(+) non-small cell lung cancer (NSCLC).**

| Sample       | Type I EBNA2/3 | Type II EBNA2/3 | EBV Strain |
|--------------|----------------|-----------------|------------|
| TCGA-96-A4JL | +              | -               | Type I     |
| JY           | +              | -               | Type I     |
| P3HR1        | +              | -               | Type II    |

**Table S2. Type I EBV was detected in EBV(+) NSCLC.** Data sets of EBV(+) JY and EBV(+) P3HR1 cells which carry either Type I or Type II EBV strain were analyzed and used as positive controls.

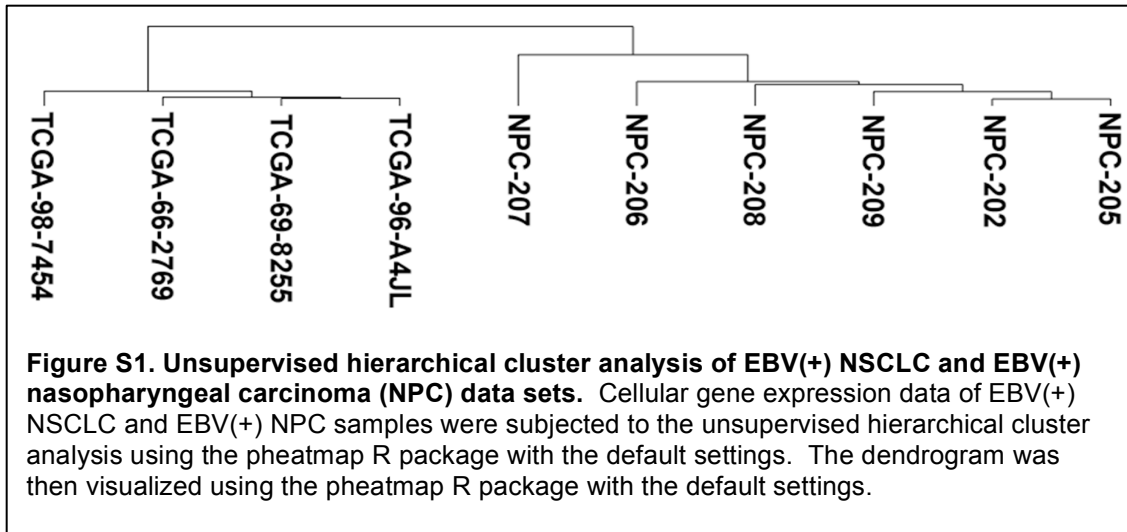

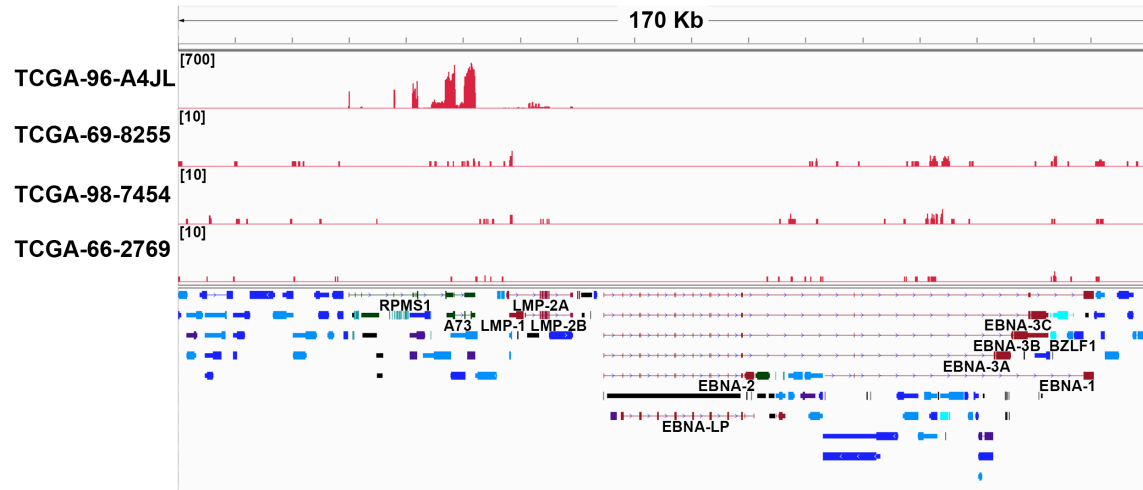

**Figure S2. The EBV transcriptome in lung cancer.** EBV genome coverage data for the four EBV(+) NSCLC. Data was displayed using the Integrative Genomics Viewer (IGV) using the modified Akata-EBV genome. The modified EBV Akata genome was split between the BBLF2/3 and the BGLF3.5 lytic genes rather than at the terminal repeats to accommodate coverage of splice junctions for the latency membrane protein LMP2. The y axis represents the number of reads at each nucleotide position. Blue features represent lytic genes, red features represent latent genes, green features represent potential noncoding genes, aquamarine features represent microRNAs, and black features represent non-gene features (e.g., repeat regions).

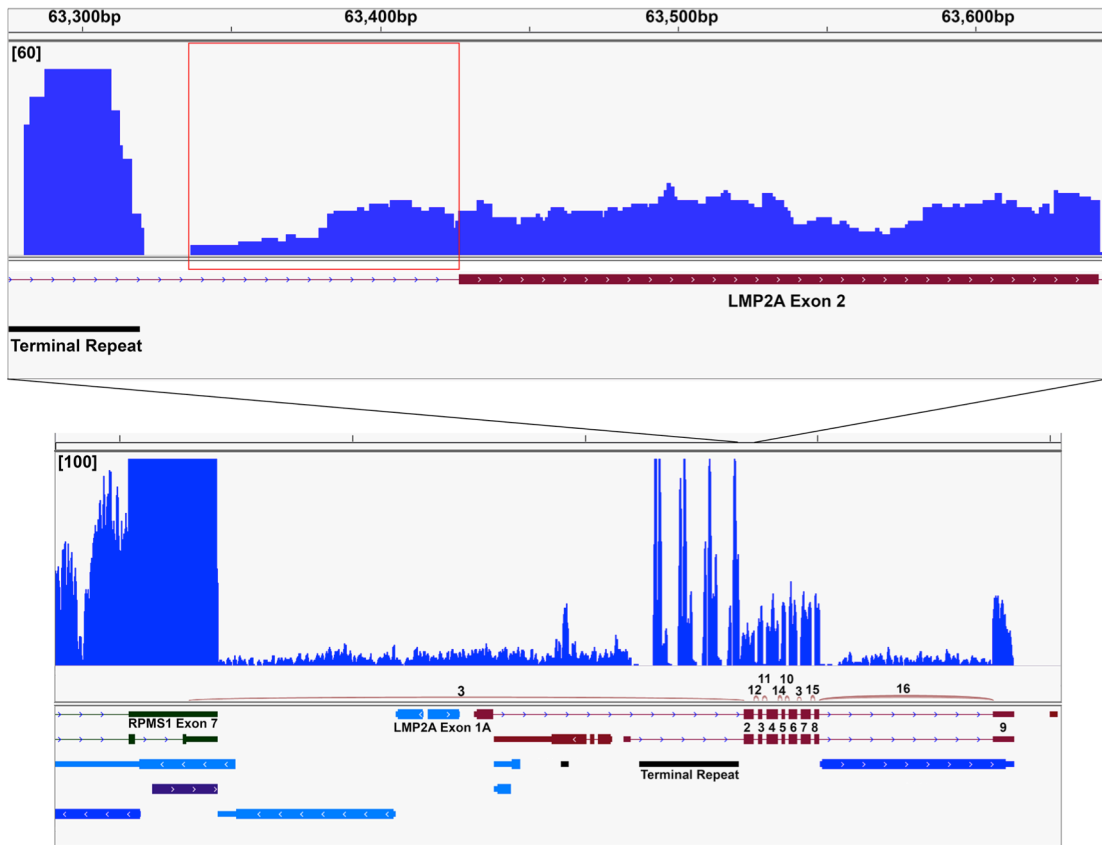

**Figure S3. Alternative splicing in the EBV LMP2A in EBV-high NSCLC.** RNA-seq data of the EBV-high NSCLC were analyzed using the STAR aligner and were aligned to the modified Akata-EBV genome to obtain splice junction information. Junctions were visualized using the Integrative Genomic Viewer (IGV). The thickness of the red junction features correlates with the number of reads for the respective junction. The number of junction spanning reads for each junction is indicated above each junction feature. Inset: Detailed read coverage data for the 5' flanking region of the second exon of EBV LMP2A.



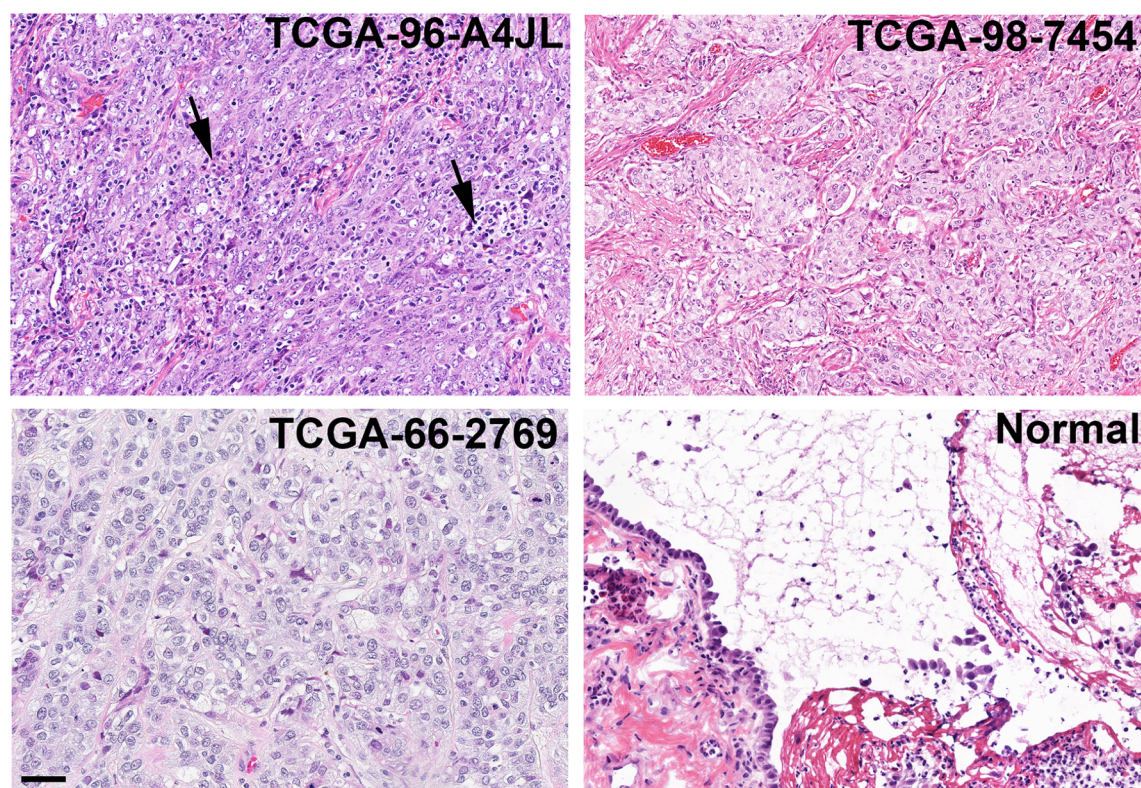

**Figure S4. Representative images of hematoxylin and eosin staining of EBV(+) NSCLC and adjacent normal lung samples.** Arrowheads point to the infiltrating immune cells. Scale bar: 50  $\mu$ m.

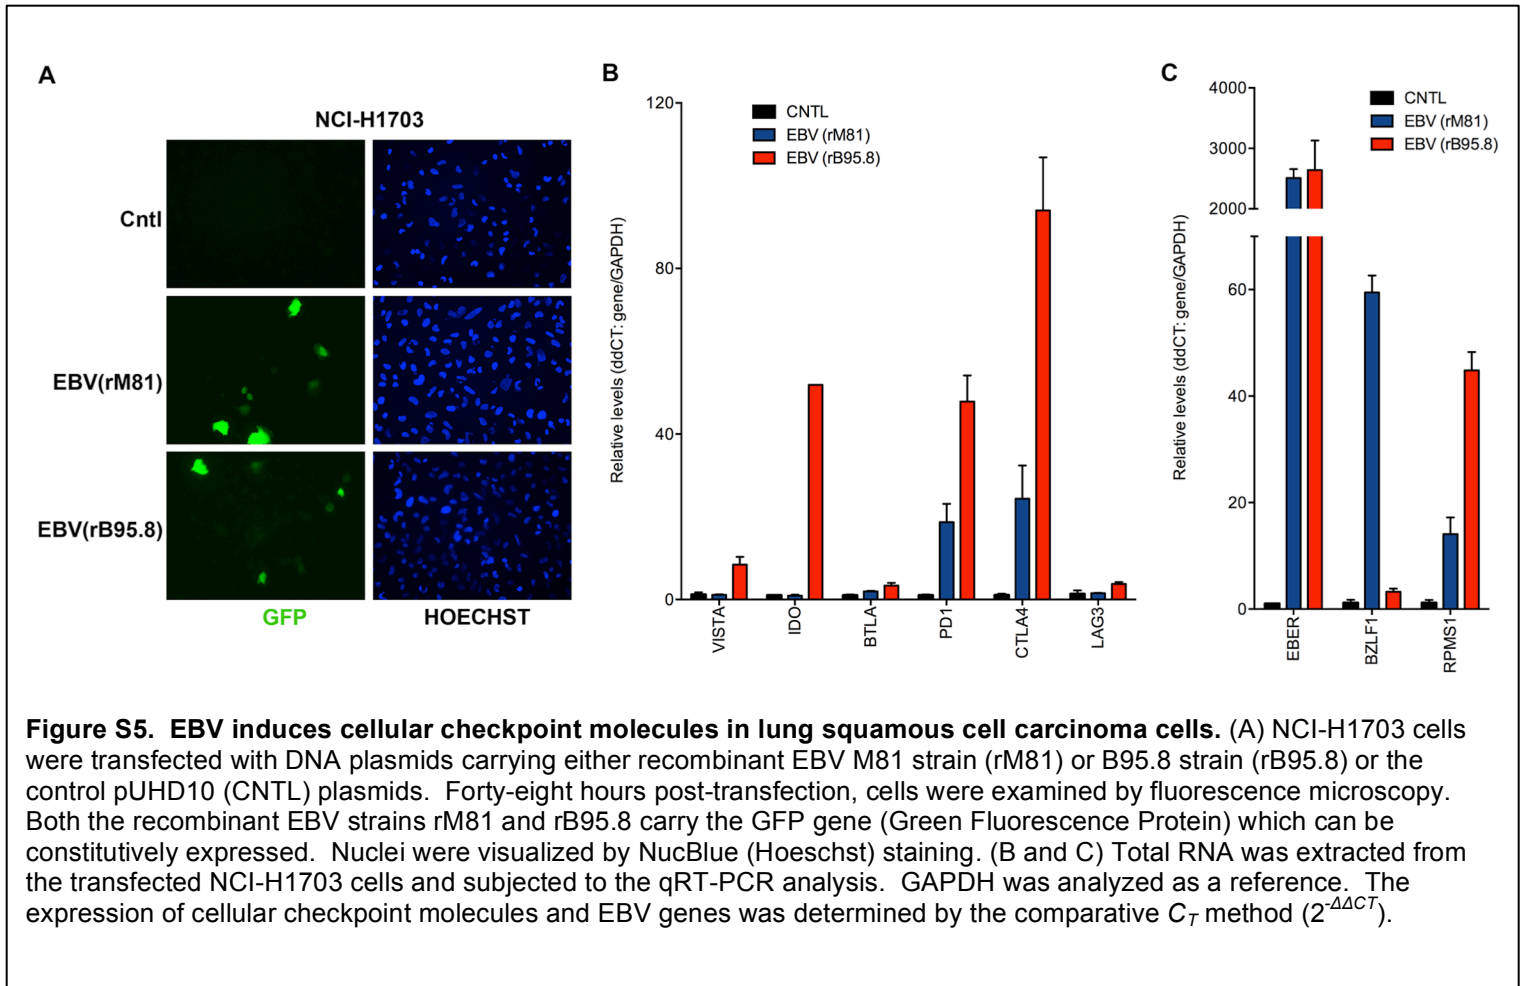

**Table S3. List of 184 analyzed human lung cancer cell lines from the Cancer Cell Line Encyclopedia (CCLE) cohort.**

| Cell_Line_ID | Gender  | Primary Site | Histology Subtype                |
|--------------|---------|--------------|----------------------------------|
| A549         | Male    | lung         | adenocarcinoma                   |
| ABC-1        | Male    | lung         | non_small_cell_carcinoma         |
| BEN          | Male    | lung         | non_small_cell_carcinoma         |
| CAL-12T      | Male    | lung         | non_small_cell_carcinoma         |
| Calu-1       | Male    | lung         | squamous_cell_carcinoma          |
| Calu-3       | Male    | lung         | adenocarcinoma                   |
| Calu-6       | Female  | lung         | undifferentiated_carcinoma       |
| ChaGo-K-1    | Male    | lung         | bronchogenic_carcinoma           |
| COLO_668     | Female  | lung         | small_cell_carcinoma             |
| COR-L105     | Male    | lung         | adenocarcinoma                   |
| COR-L23      | Male    | lung         | large_cell_carcinoma             |
| COR-L24      | Male    | lung         | small_cell_carcinoma             |
| COR-L279     | Male    | lung         | small_cell_carcinoma             |
| COR-L311     | Male    | lung         | small_cell_carcinoma             |
| COR-L47      | Male    | lung         | small_cell_carcinoma             |
| COR-L88      | Male    | lung         | small_cell_carcinoma             |
| COR-L95      | Male    | lung         | small_cell_carcinoma             |
| DM-3         | Male    | lung         | Pleural_sarcomatoid_mesothelioma |
| DMS_114      | Male    | lung         | small_cell_carcinoma             |
| DMS_153      | Male    | lung         | small_cell_carcinoma             |
| DMS_273      | Female  | lung         | small_cell_carcinoma             |
| DMS_454      | Male    | lung         | small_cell_carcinoma             |
| DMS_53       | Male    | lung         | small_cell_carcinoma             |
| DMS_79       | Male    | lung         | small_cell_carcinoma             |
| DV-90        | Male    | lung         | adenocarcinoma                   |
| EBC-1        | Male    | lung         | squamous_cell_carcinoma          |
| EKVX         | Unknown | lung         | adenocarcinoma                   |
| EPLC-272H    | Male    | lung         | squamous_cell_carcinoma          |
| HARA         | Male    | lung         | squamous_cell_carcinoma          |
| HCC-1171     | Male    | lung         | non_small_cell_carcinoma         |
| HCC-1195     | Male    | lung         | mixed_adenosquamous_carcinoma    |
| HCC-1359     | Female  | lung         | large_cell_carcinoma             |
| HCC-1438     | Male    | lung         | large_cell_carcinoma             |
| HCC-15       | Male    | lung         | squamous_cell_carcinoma          |
| HCC-1588     | Female  | lung         | squamous_cell_carcinoma          |
| HCC-1833     | Unknown | lung         | adenocarcinoma                   |
| HCC-2108     | Male    | lung         | adenocarcinoma                   |
| HCC-2279     | Female  | lung         | adenocarcinoma                   |

|            |         |      |                                  |
|------------|---------|------|----------------------------------|
| HCC-33     | Male    | lung | small_cell_carcinoma             |
| HCC-366    | Female  | lung | mixed_adenosquamous_carcinoma    |
| HCC-44     | Female  | lung | adenocarcinoma                   |
| HCC-78     | Male    | lung | adenocarcinoma                   |
| HCC-95     | Male    | lung | squamous_cell_carcinoma          |
| HCC2935    | Male    | lung | non_small_cell_carcinoma         |
| HCC4006    | Male    | lung | adenocarcinoma                   |
| HCC827     | Female  | lung | adenocarcinoma                   |
| HLF-a      | Female  | lung | squamous_cell_carcinoma          |
| HOP-62     | Female  | lung | adenocarcinoma                   |
| HOP-92     | Male    | lung | NSCLC                            |
| Hs_229.T   | Male    | lung | adenocarcinoma                   |
| Hs_618.T   | Female  | lung | adenocarcinoma                   |
| IA-LM      | Male    | lung | large_cell_carcinoma             |
| IST-MES1   | Female  | lung | Pleural_epithelioid_mesothelioma |
| IST-MES2   | Male    | lung | Pleural_epithelioid_mesothelioma |
| JL-1       | Male    | lung | Pleural_epithelioid_mesothelioma |
| KNS-62     | Male    | lung | squamous_cell_carcinoma          |
| LC-1F      | Male    | lung | squamous_cell_carcinoma          |
| LCLC-103H  | Male    | lung | large_cell_carcinoma             |
| LCLC-97TM1 | Male    | lung | large_cell_carcinoma             |
| LK-2       | Male    | lung | squamous_cell_carcinoma          |
| LOU-NH91   | Female  | lung | squamous_cell_carcinoma          |
| LU65       | Male    | lung | non_small_cell_carcinoma         |
| LU99       | Male    | lung | large_cell_carcinoma             |
| LUDLU-1    | Male    | lung | squamous_cell_carcinoma          |
| LXF-289    | Male    | lung | adenocarcinoma                   |
| MOR_CPR    | Unknown | lung | adenocarcinoma                   |
| MPP_89     | Male    | lung | Pleural_epithelioid_mesothelioma |
| MSTO-211H  | Male    | lung | Pleural_biphasic_mesothelioma    |
| NCI-H1048  | Female  | lung | small_cell_carcinoma             |
| NCI-H1092  | Male    | lung | small_cell_carcinoma             |
| NCI-H1105  | Male    | lung | small_cell_carcinoma             |
| NCI-H1155  | Male    | lung | large_cell_carcinoma             |
| NCI-H1184  | Male    | lung | small_cell_carcinoma             |
| NCI-H1299  | Male    | lung | non_small_cell_carcinoma         |
| NCI-H1339  | Female  | lung | small_cell_carcinoma             |
| NCI-H1341  | Female  | lung | small_cell_carcinoma             |
| NCI-H1355  | Male    | lung | adenocarcinoma                   |
| NCI-H1385  | Female  | lung | squamous_cell_carcinoma          |
| NCI-H1395  | Female  | lung | adenocarcinoma                   |

|           |        |      |                                   |
|-----------|--------|------|-----------------------------------|
| NCI-H1435 | Female | lung | non_small_cell_carcinoma          |
| NCI-H1436 | Male   | lung | small_cell_carcinoma              |
| NCI-H1437 | Male   | lung | adenocarcinoma                    |
| NCI-H146  | Male   | lung | small_cell_carcinoma              |
| NCI-H1563 | Male   | lung | adenocarcinoma                    |
| NCI-H1568 | Female | lung | non_small_cell_carcinoma          |
| NCI-H1573 | Female | lung | adenocarcinoma                    |
| NCI-H1581 | Male   | lung | large_cell_carcinoma              |
| NCI-H1618 | Female | lung | small_cell_carcinoma              |
| NCI-H1623 | Male   | lung | adenocarcinoma                    |
| NCI-H1648 | Male   | lung | adenocarcinoma                    |
| NCI-H1650 | Male   | lung | bronchioloalveolar_adenocarcinoma |
| NCI-H1651 | Male   | lung | adenocarcinoma                    |
| NCI-H1666 | Female | lung | bronchioloalveolar_adenocarcinoma |
| NCI-H1693 | Female | lung | adenocarcinoma                    |
| NCI-H1694 | Male   | lung | small_cell_carcinoma              |
| NCI-H1703 | Male   | lung | squamous_cell_carcinoma           |
| NCI-H1734 | Female | lung | adenocarcinoma                    |
| NCI-H1755 | Female | lung | adenocarcinoma                    |
| NCI-H1781 | Female | lung | bronchioloalveolar_adenocarcinoma |
| NCI-H1792 | Male   | lung | adenocarcinoma                    |
| NCI-H1793 | Female | lung | non_small_cell_carcinoma          |
| NCI-H1838 | Female | lung | non_small_cell_carcinoma          |
| NCI-H1869 | Male   | lung | squamous_cell_carcinoma           |
| NCI-H1876 | Male   | lung | small_cell_carcinoma              |
| NCI-H1915 | Female | lung | large_cell_carcinoma              |
| NCI-H1930 | Male   | lung | small_cell_carcinoma              |
| NCI-H1944 | Female | lung | non_small_cell_carcinoma          |
| NCI-H196  | Male   | lung | small_cell_carcinoma              |
| NCI-H1963 | Male   | lung | small_cell_carcinoma              |
| NCI-H1975 | Female | lung | non_small_cell_carcinoma          |
| NCI-H2009 | Female | lung | adenocarcinoma                    |
| NCI-H2023 | Male   | lung | adenocarcinoma                    |
| NCI-H2029 | Female | lung | small_cell_carcinoma              |
| NCI-H2030 | Male   | lung | non_small_cell_carcinoma          |
| NCI-H2052 | Male   | lung | Pleural_sarcomatoid_mesothelioma  |
| NCI-H2066 | Female | lung | small_cell_carcinoma              |
| NCI-H2073 | Female | lung | adenocarcinoma                    |
| NCI-H2081 | Female | lung | small_cell_carcinoma              |
| NCI-H2085 | Male   | lung | adenocarcinoma                    |
| NCI-H2087 | Male   | lung | adenocarcinoma                    |

|           |         |      |                                   |
|-----------|---------|------|-----------------------------------|
| NCI-H209  | Male    | lung | small_cell_carcinoma              |
| NCI-H2106 | Male    | lung | non_small_cell_carcinoma          |
| NCI-H211  | Female  | lung | small_cell_carcinoma              |
| NCI-H2110 | Unknown | lung | non_small_cell_carcinoma          |
| NCI-H2122 | Female  | lung | adenocarcinoma                    |
| NCI-H2126 | Male    | lung | adenocarcinoma                    |
| NCI-H2170 | Male    | lung | squamous_cell_carcinoma           |
| NCI-H2171 | Male    | lung | small_cell_carcinoma              |
| NCI-H2172 | Female  | lung | non_small_cell_carcinoma          |
| NCI-H2196 | Male    | lung | small_cell_carcinoma              |
| NCI-H2227 | Male    | lung | small_cell_carcinoma              |
| NCI-H2228 | Female  | lung | adenocarcinoma                    |
| NCI-H226  | Male    | lung | squamous_cell_carcinoma           |
| NCI-H2286 | Female  | lung | small_cell_carcinoma              |
| NCI-H2291 | Male    | lung | adenocarcinoma                    |
| NCI-H23   | Male    | lung | non_small_cell_carcinoma          |
| NCI-H2342 | Male    | lung | adenocarcinoma                    |
| NCI-H2347 | Female  | lung | adenocarcinoma                    |
| NCI-H2405 | Male    | lung | adenocarcinoma                    |
| NCI-H2444 | Male    | lung | non_small_cell_carcinoma          |
| NCI-H2452 | Male    | lung | Pleural_biphasic_mesothelioma     |
| NCI-H28   | Male    | lung | Pleural_sarcomatoid_mesothelioma  |
| NCI-H292  | Female  | lung | mucoepidermoid_carcinoma          |
| NCI-H322  | Male    | lung | adenocarcinoma                    |
| NCI-H3255 | Female  | lung | adenocarcinoma                    |
| NCI-H358  | Male    | lung | bronchioloalveolar_adenocarcinoma |
| NCI-H441  | Male    | lung | adenocarcinoma                    |
| NCI-H446  | Male    | lung | small_cell_carcinoma              |
| NCI-H460  | Male    | lung | large_cell_carcinoma              |
| NCI-H510  | Male    | lung | small_cell_carcinoma              |
| NCI-H520  | Male    | lung | squamous_cell_carcinoma           |
| NCI-H522  | Male    | lung | non_small_cell_carcinoma          |
| NCI-H524  | Male    | lung | small_cell_carcinoma              |
| NCI-H526  | Male    | lung | small_cell_carcinoma              |
| NCI-H596  | Male    | lung | mixed_adenosquamous_carcinoma     |
| NCI-H647  | Male    | lung | mixed_adenosquamous_carcinoma     |
| NCI-H650  | Male    | lung | bronchioloalveolar_adenocarcinoma |
| NCI-H661  | Male    | lung | large_cell_carcinoma              |
| NCI-H69   | Male    | lung | small_cell_carcinoma              |
| NCI-H727  | Female  | lung | non_small_cell_carcinoma          |
| NCI-H810  | Male    | lung | large_cell_carcinoma              |

|             |         |      |                                  |
|-------------|---------|------|----------------------------------|
| NCI-H82     | Male    | lung | small_cell_carcinoma             |
| NCI-H838    | Male    | lung | non_small_cell_carcinoma         |
| NCI-H841    | Male    | lung | small_cell_carcinoma             |
| NCI-H854    | Unknown | lung | adenocarcinoma                   |
| NCI-H889    | Female  | lung | small_cell_carcinoma             |
| PC-14       | Unknown | lung | non_small_cell_carcinoma         |
| RERF-LC-Ad1 | Male    | lung | adenocarcinoma                   |
| RERF-LC-Ad2 | Male    | lung | adenocarcinoma                   |
| RERF-LC-AI  | Male    | lung | squamous_cell_carcinoma          |
| RERF-LC-KJ  | Male    | lung | non_small_cell_carcinoma         |
| RERF-LC-MS  | Unknown | lung | non_small_cell_carcinoma         |
| RERF-LC-Sq1 | Female  | lung | squamous_cell_carcinoma          |
| RS-5        | Male    | lung | Pleural_sarcomatoid_mesothelioma |
| SBC-5       | Unknown | lung | small_cell_carcinoma             |
| SCLC-21H    | Male    | lung | small_cell_carcinoma             |
| SHP-77      | Male    | lung | small_cell_carcinoma             |
| SK-LU-1     | Female  | lung | adenocarcinoma                   |
| SK-MES-1    | Male    | lung | squamous_cell_carcinoma          |
| Sq-1        | Unknown | lung | squamous_cell_carcinoma          |
| SW_1271     | Male    | lung | small_cell_carcinoma             |
| SW_1573     | Female  | lung | adnocarcinoma                    |
| SW_900      | Male    | lung | squamous_cell_carcinoma          |
| T3M-10      | Male    | lung | large_cell_carcinoma             |
